# Supplementary material for: Brain-enriched RagB isoforms regulate the dynamics of mTORC1 activity through GATOR1 inhibition
Source: PubMed Central journal article supplement (PMC9481464; doi:10.1038/s41556-022-00977-x), 2022-09-12

**Fig. 1b unprocessed blots**

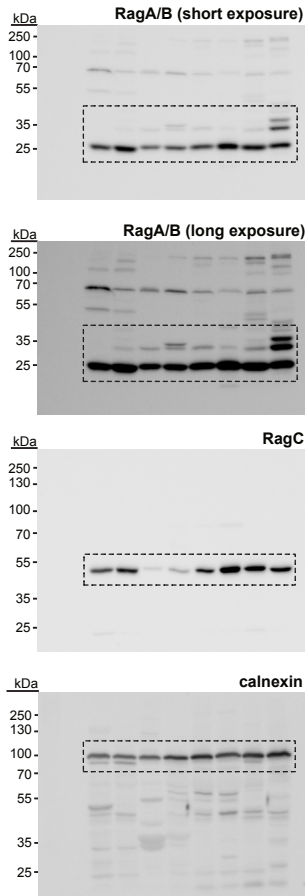

**Fig. 1e unprocessed blots**

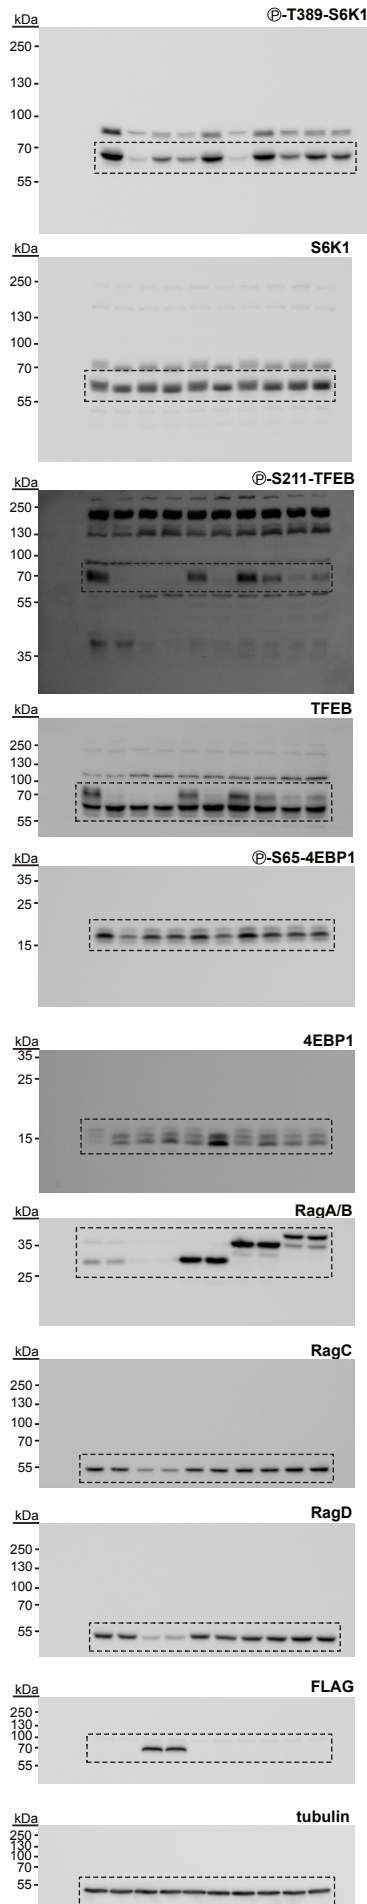

**Fig. 1i unprocessed blots**

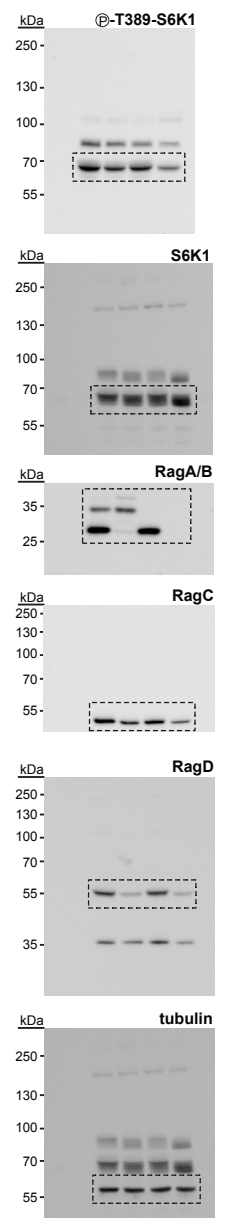

Fig. 1k unprocessed blots

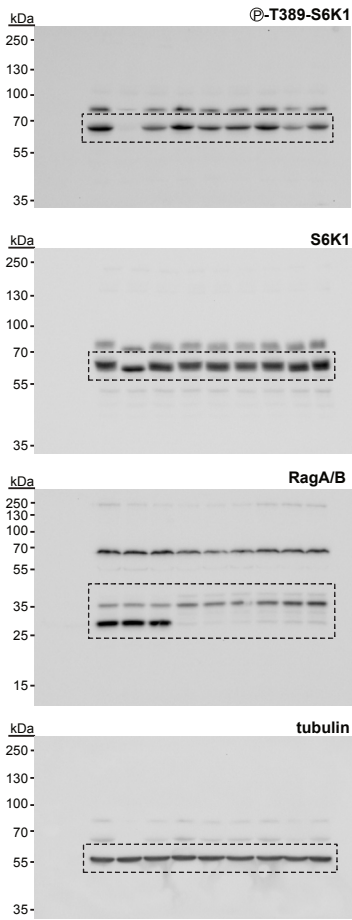

Fig. 1m unprocessed blots

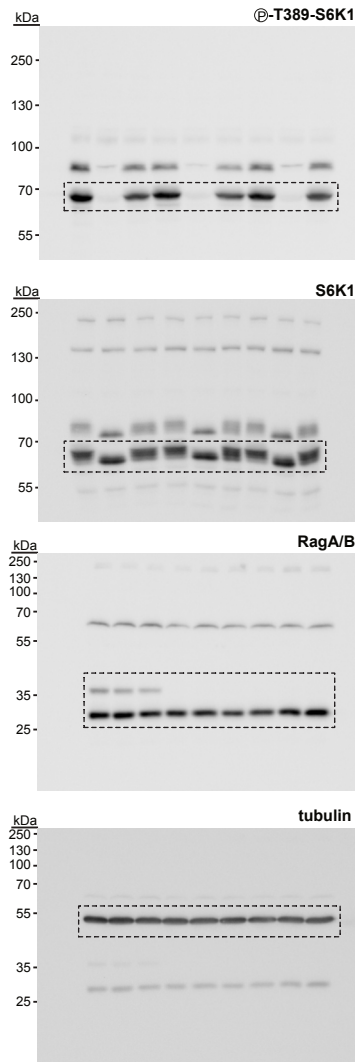

Fig. 1o unprocessed blots

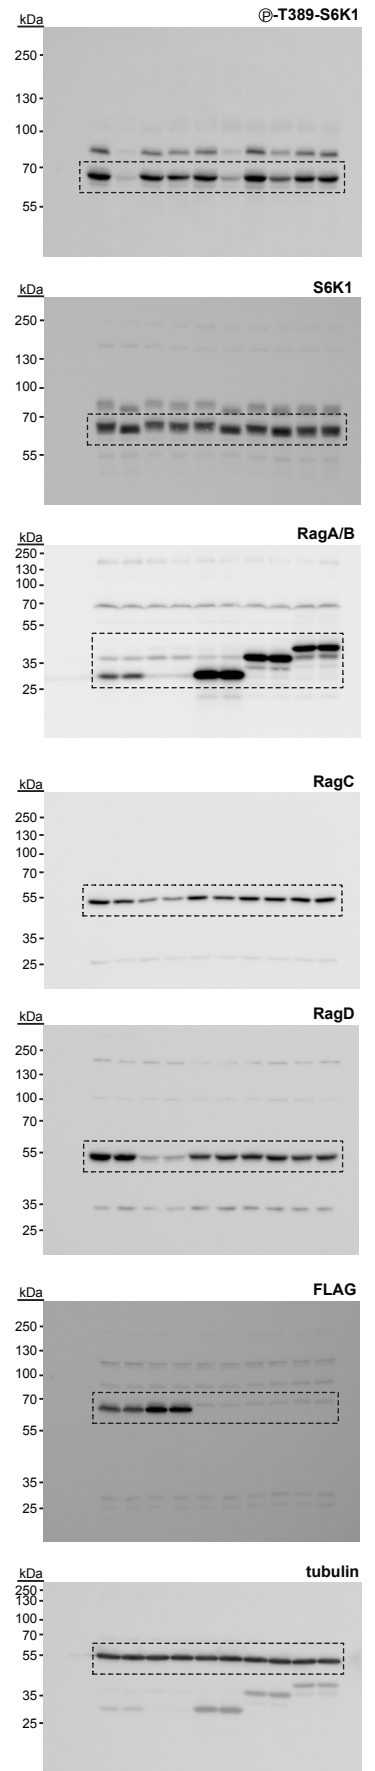

Supplement: 41556_2022_977_MOESM4_ESM.pdf [file 41556_2022_977_MOESM4_ESM.pdf]
