# Supplementary material for: Brain-enriched RagB isoforms regulate the dynamics of mTORC1 activity through GATOR1 inhibition
Source: PubMed Central journal article supplement (PMC9481464; doi:10.1038/s41556-022-00977-x), 2022-09-12

**Fig. 3a unprocessed blots**

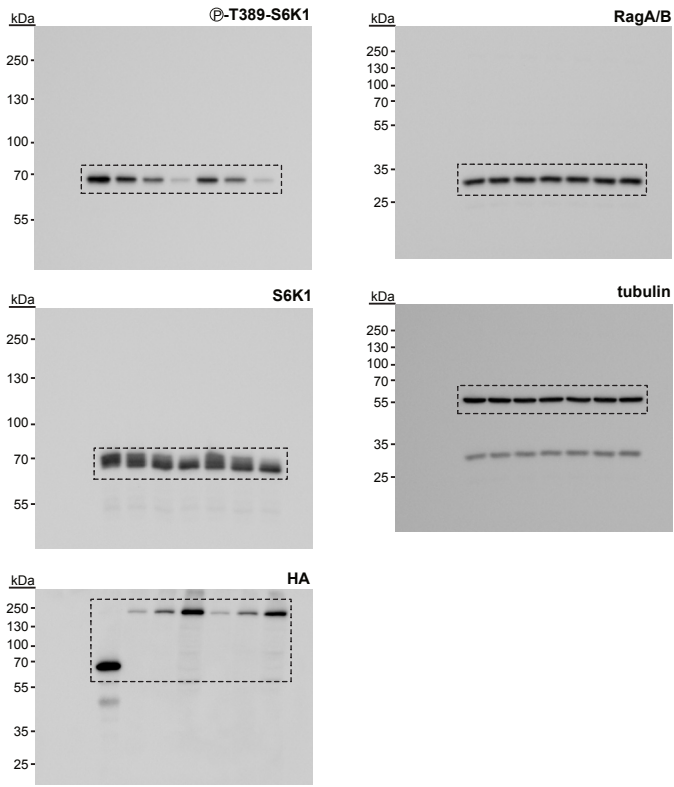

**Fig. 3c unprocessed blots**

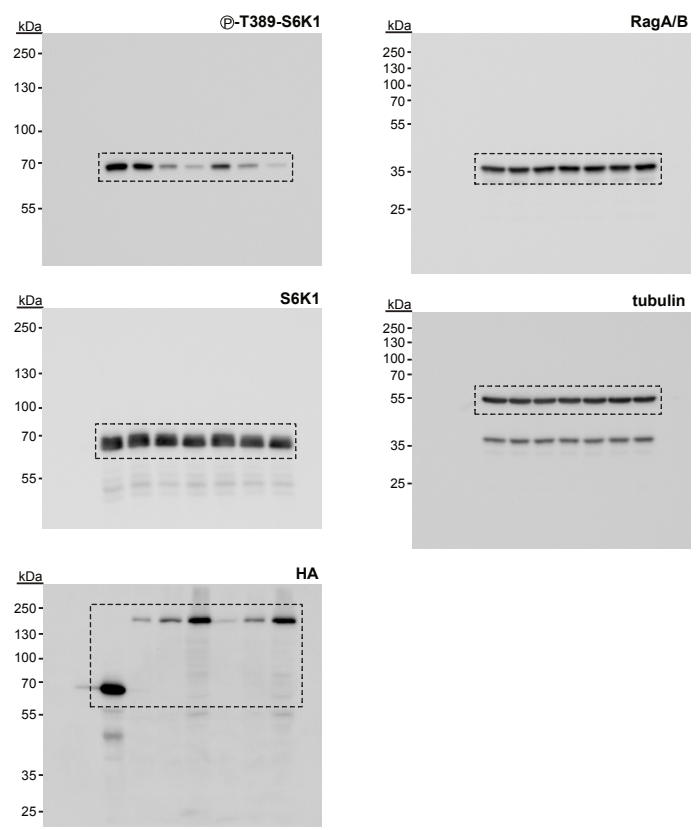

**Fig. 3e unprocessed blots**

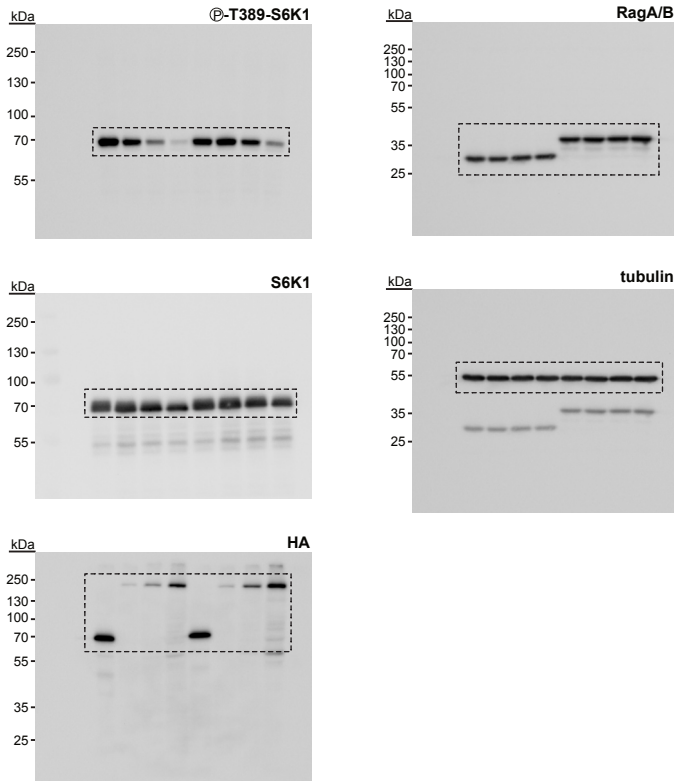

**Fig. 3g unprocessed blots**

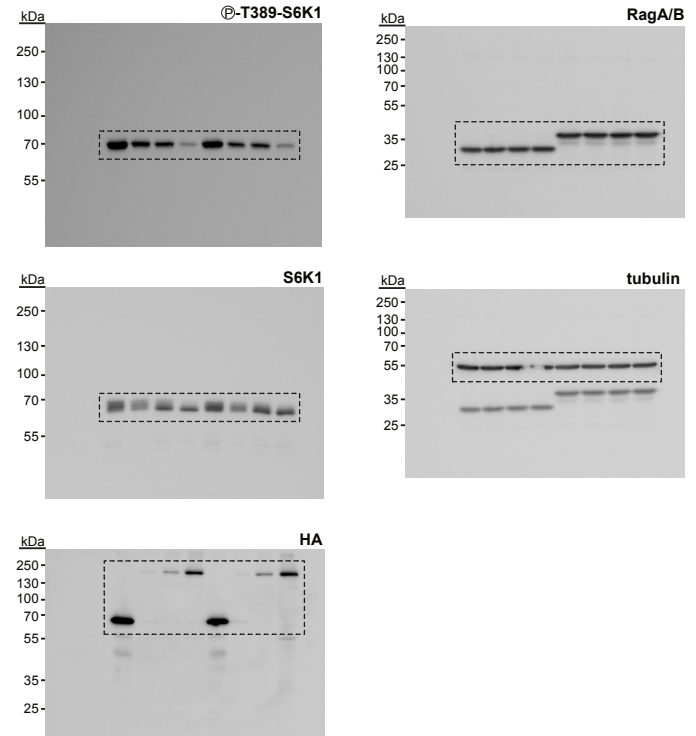

Supplement: 41556_2022_977_MOESM8_ESM.pdf [file 41556_2022_977_MOESM8_ESM.pdf]
