# Supplementary material for: Brain-enriched RagB isoforms regulate the dynamics of mTORC1 activity through GATOR1 inhibition
Source: PubMed Central journal article supplement (PMC9481464; doi:10.1038/s41556-022-00977-x), 2022-09-12

ED Fig. 3e unprocessed blots

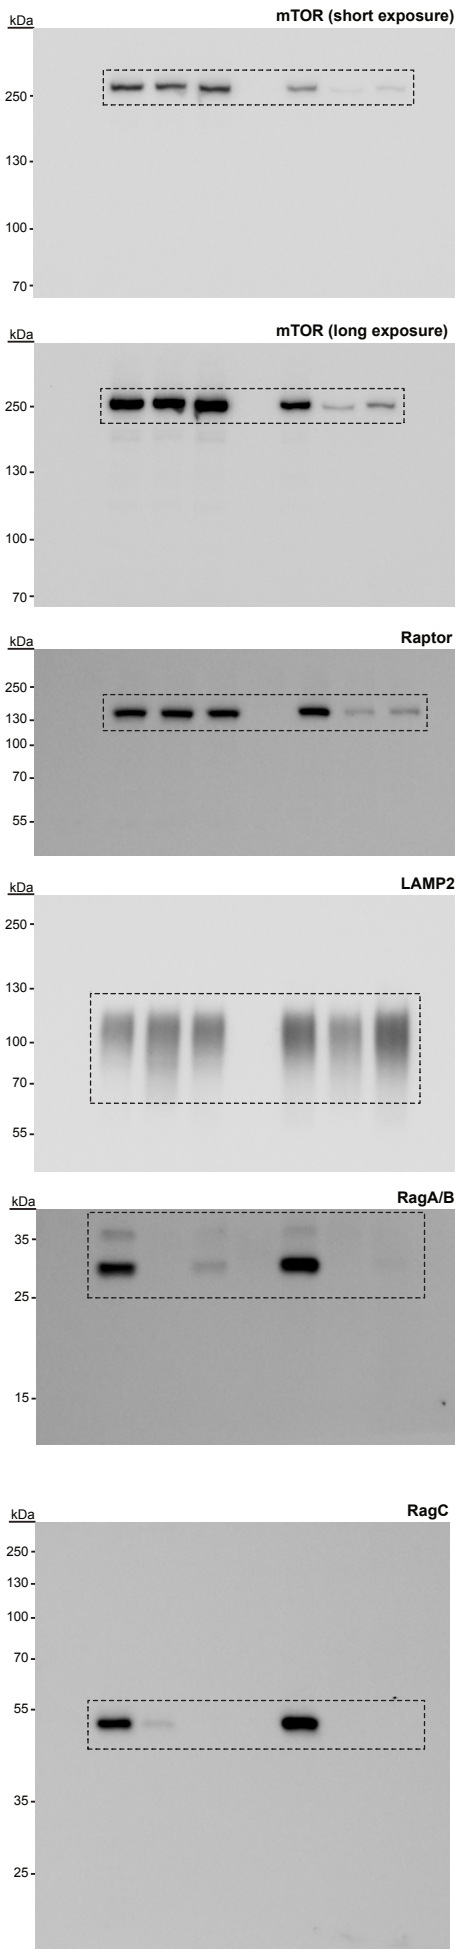

ED Fig. 3I unprocessed blots

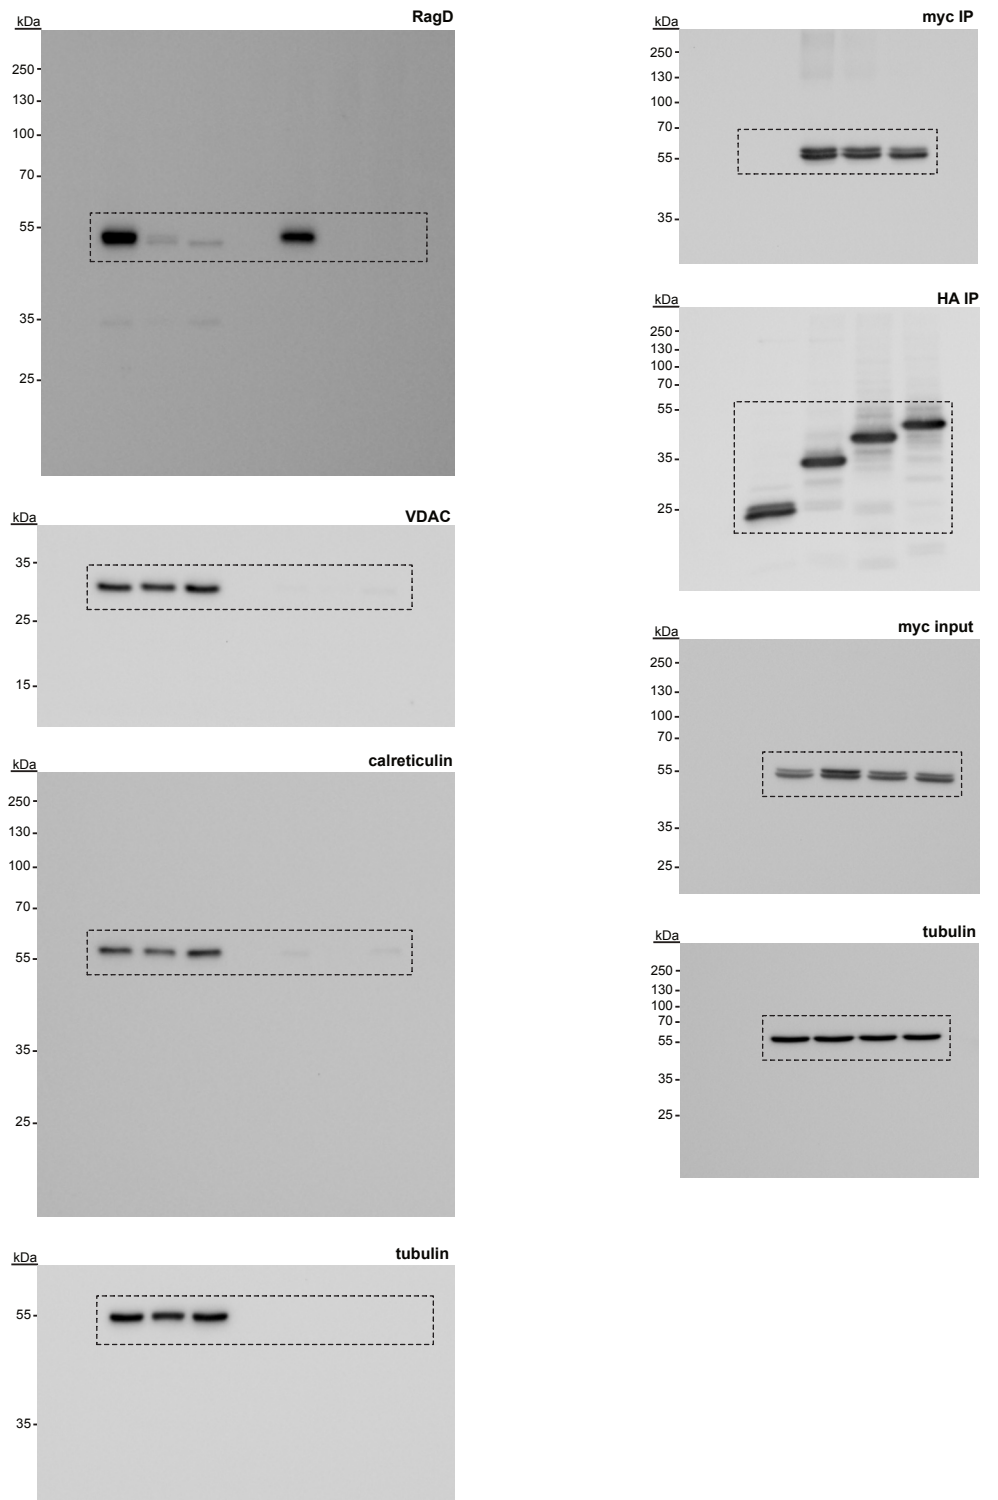

Supplement: 41556_2022_977_MOESM20_ESM.pdf [file 41556_2022_977_MOESM20_ESM.pdf]
